# Supplementary material for: Development of a High-Throughput Serum Neutralization Test Using Recombinant Pestiviruses Possessing a Small Reporter Tag
Source: PubMed Central journal article supplement (PMC7157198; doi:10.3390/pathogens9030188), 2020-03-04
Supplement: pathogens-09-00188-s001.pdf [file pathogens-09-00188-s001.pdf]

**Table S1.** Primers for the construction of HiBiT recombinant full-length cDNA of BDV and virus rescue for BVDV-1 and BDV.

| Primer            | Direction <sup>a</sup> | Sequence (5'→3') <sup>b</sup>                                       |
|-------------------|------------------------|---------------------------------------------------------------------|
| BDV-FNK-RT        | R                      | GGGCTGTTAGGGTTTTTCCTTAATCCAA                                        |
| BDV-FNK-F         | F                      | GTATACGGGGTAGCTCATGCCCCGTGTACAAAATTGGACTTT                          |
| BDV-FNK-R         | R                      | GGGCTGTTAGGGTTTTTCCTTAATCCAACCTCTGGACTTCA                           |
| BDV-FNK-15_pBR    | F                      | AGTACCCCGTATACGGCGCCCGCCGTCGACCAATTCTCATGTTTGACAGCTTATC             |
| BDV-FNK-15_pBF    | R                      | AAACCCTAACAGCCCGCGCCGCATCGAATATAACTTCGT                             |
| FNK-Erns-HiBiT- F | F                      | attagcgggagtctggcggctcgagcggGAGAATATAACACAATGGAACC                  |
| FNK-Erns-HiBiT- R | R                      | cttctgaacagccgccagcgcctcacTGGTGCTACAGGCTGCCACATCAG                  |
| BDV-T7-F          | F                      | <u>TAATACGACTCACTATA</u> GTATACGGGGTAGCTCATGCCCCGTGTACAAAATTGGACTTT |
| NCP-T7-F          | F                      | <u>TAATACGACTCACTATA</u> GTATACGAGGTTAGGCAAGTTCTCGTATACATATTGGACAC  |
| NCP-7-R           | R                      | GGGCTGTTAAGGGTTTTCCCTAGTCCAACC                                      |

<sup>a</sup> “F” indicates forward, and “R” indicates reverse.

<sup>b</sup> The underlined sequence indicates the T7 promoter sequence. Lower-case letters indicate the HiBiT and linker sequences.

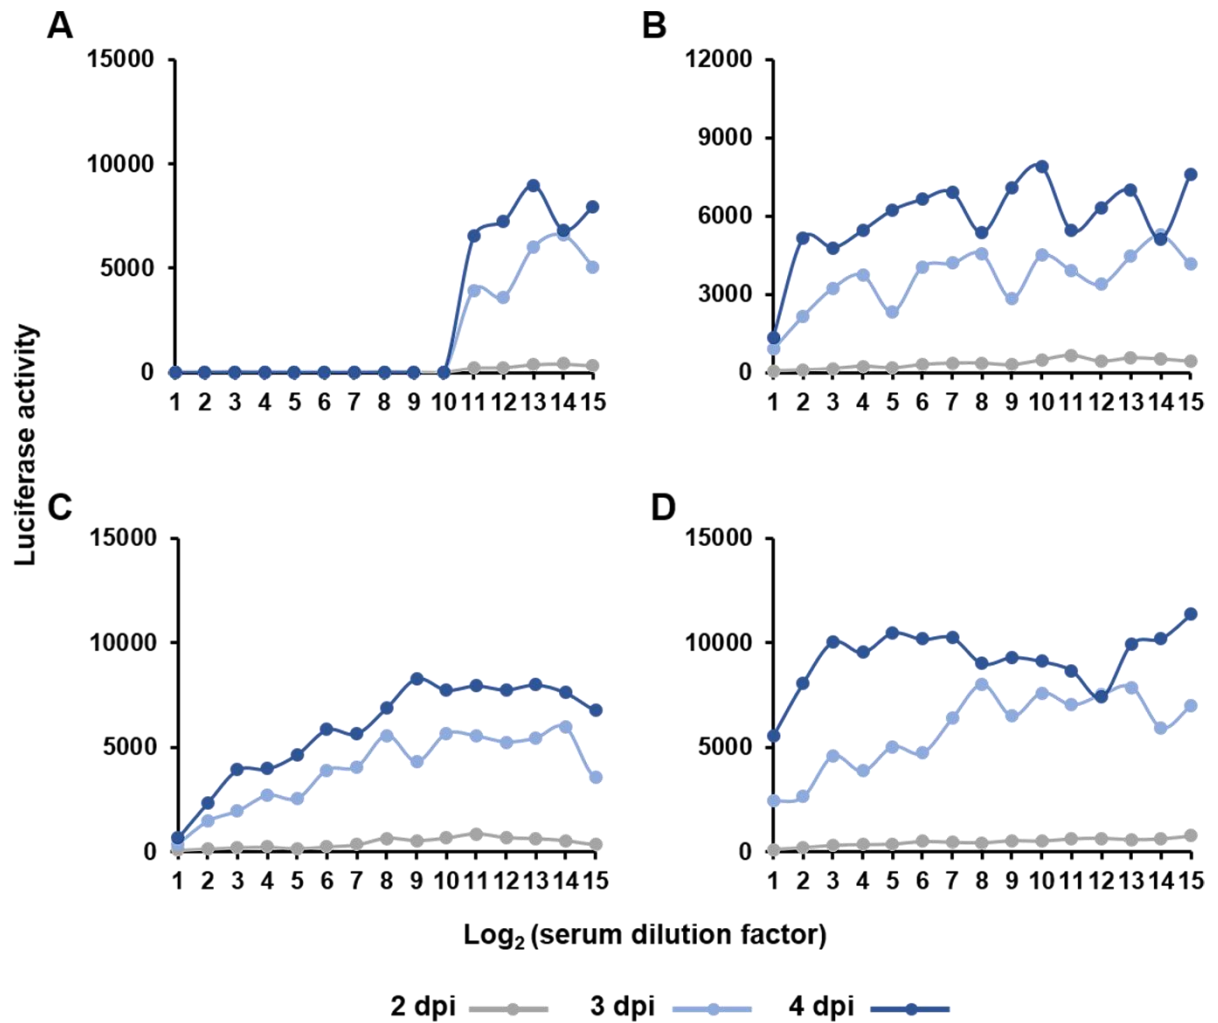

**Figure S1.** Serum neutralization test using recombinant CSFV carrying HiBiT and anti-pestivirus serum. vCSFV GPE<sup>-</sup>/HiBiT was incubated with two-fold serially diluted anti-CSFV serum (A), anti-BVDV-1 serum (B), anti-BVDV-2 serum (C), or anti-BDV serum (D). Luciferase activity in the culture supernatant of 96-well plates was determined on 2, 3, and 4 days post-infection (dpi). The cut-off value (luciferase activity = 70) to signal complete neutralization was calculated based on that of mock-infected 96-well plates as described in the Materials and Methods. The diagram of obtained luciferase activity was figured out as a sigmoid curve using ImageJ (version 1.52t) for the calculation of 50% effective concentration (EC<sub>50</sub>).

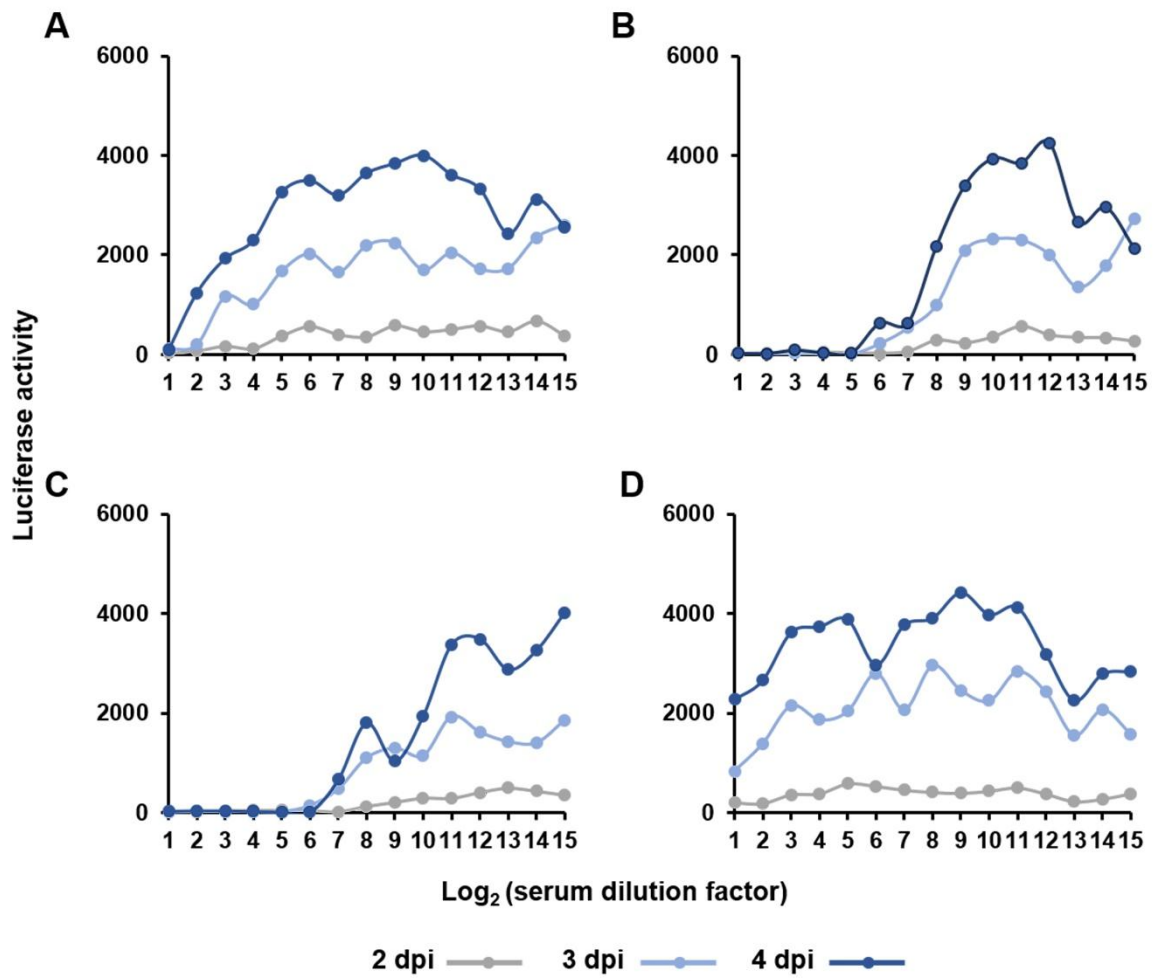

**Figure S2.** Serum neutralization test using recombinant BVDV-1 carrying HiBiT and anti-pestivirus serum. vBVDV-1 NCP7/HiBiT was incubated with two-fold serially diluted anti-CSFV serum (A), anti-BVDV-1 serum (B), anti-BVDV-2 serum (C), or anti-BDV serum (D). Luciferase activity in the cell lysate of 96-well plates was determined on 2, 3, and 4 days post-infection (dpi). The cut-off value (luciferase activity = 70) to signal complete neutralization was calculated based on that of mock-infected 96-well plates as described in the Materials and Methods. The diagram of obtained luciferase activity was figured out as a sigmoid curve using ImageJ (version 1.52t) for the calculation of 50% effective concentration (EC<sub>50</sub>).

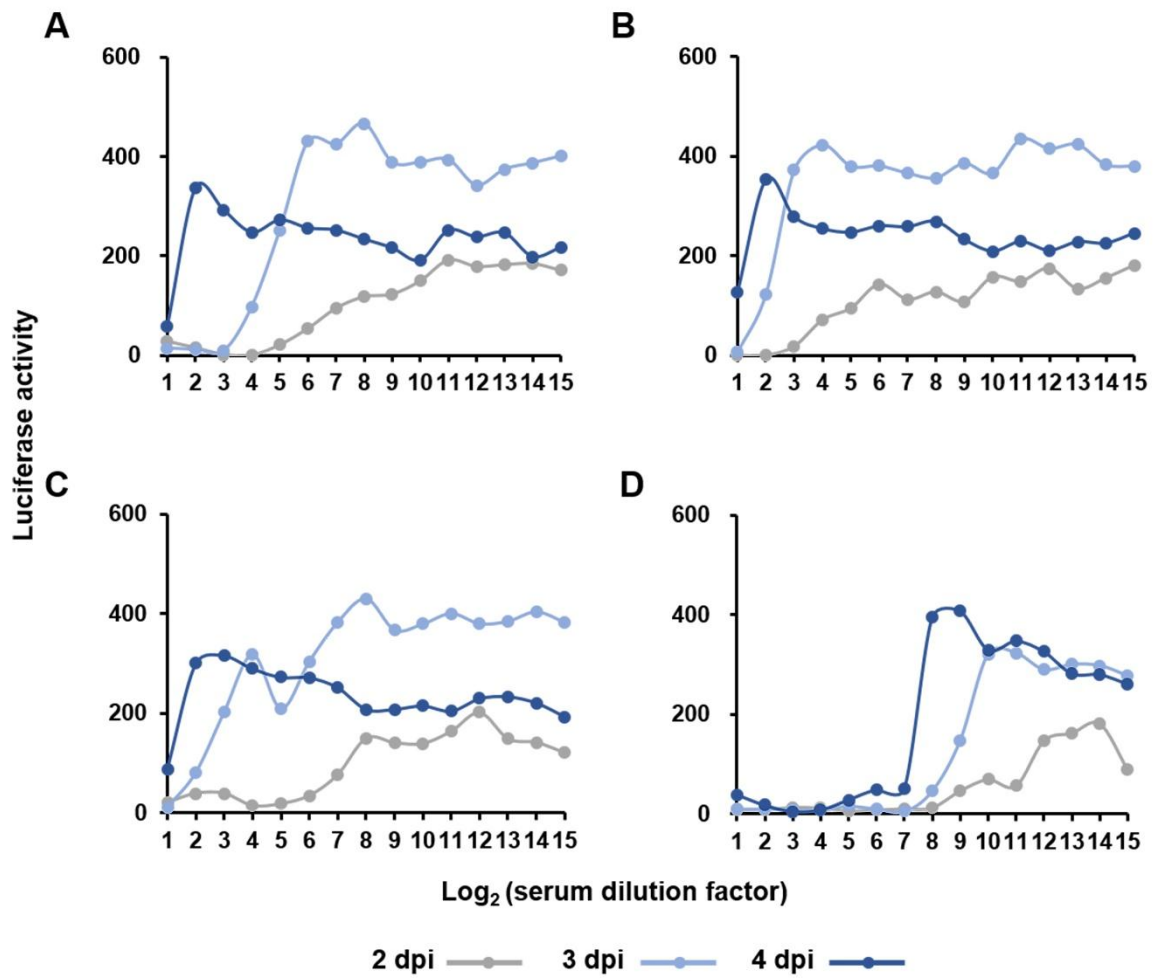

**Figure S3.** Serum neutralization test using recombinant BDV carrying HiBiT and anti-pestivirus serum. vBDV FNK/HiBiT was incubated with two-fold serially diluted anti-CSFV serum (A), anti-BVDV-1 serum (B), anti-BVDV-2 serum (C), or anti-BDV serum (D). Luciferase activity in the cell lysate of 96-well plates was determined on 2, 3, and 4 days post-infection (dpi). The cut-off value (luciferase activity = 70) to signal complete neutralization was calculated based on that of mock-infected 96-well plates as described in the Materials and Methods. The diagram of obtained luciferase activity was figured out as a sigmoid curve using ImageJ (version 1.52t) for the calculation of 50% effective concentration (EC<sub>50</sub>).
